# Supplementary material for: Identification of miRNA-Based Signature as a Novel Potential Prognostic Biomarker in Patients with Breast Cancer
Source: Hindawi journal article supplement (doi:10.1155/2019/3815952), 2019-12-30
Supplement: f1 [file 3815952.f1.pdf]

# Supplementary Information

## Title page

**Identification of miRNA-based signature as a novel potential prognostic biomarker  
in patients with breast cancer**

Jia Tang<sup>1,2</sup>;

[tony2081129@163.com](mailto:tony2081129@163.com)

Wei Ma<sup>3</sup>;

[mawei@westlake.edu.cn](mailto:mawei@westlake.edu.cn)

Qinlong Zeng<sup>1</sup>;

[564916488@qq.com](mailto:564916488@qq.com)

Jieliang Tan<sup>1</sup>;

[18026882602@qq.com](mailto:18026882602@qq.com)

Keshen Cao<sup>1</sup>;

[445730661@qq.com](mailto:445730661@qq.com)

Liangping Luo<sup>2\*</sup>

[tony2081129@sohu.com](mailto:tony2081129@sohu.com)

1. Medical Genetics Center, Jiangmen Maternity and Child Health Care Hospital,  
Jiangmen, Guangdong, 529000, China;

2. Department of Medical Imaging Center, The First Affiliated Hospital of Jinan University,  
Jinan University, Guangzhou, Guangdong, 510080, China;

3. Department of Biology, School of Basic Medicine, Jiamusi University, Jiamusi,  
Heilongjiang, 154007, China

**Correspondence to** Liangping Luo

**Address:** Medical Imaging Center, the First Affiliated Hospital of Jinan University,  
Guangzhou, Guangdong, 510632, P R China.

**Email:** [tony2081129@sohu.com](mailto:tony2081129@sohu.com)

**Tel.:** +86 17727606698

**Word counts:** 5232 (Including the Reference)

**Online Supplementary Materials**

Supplementary Table 1-4 and Supplementary Figure 1-3

Fig. S1. Kaplan-Meier curves of survival associated miRNA detected with univariable Cox Regression analysis. A. Overall survival related-miRNAs; B. Recurrence-free survival related miRNAs.

A

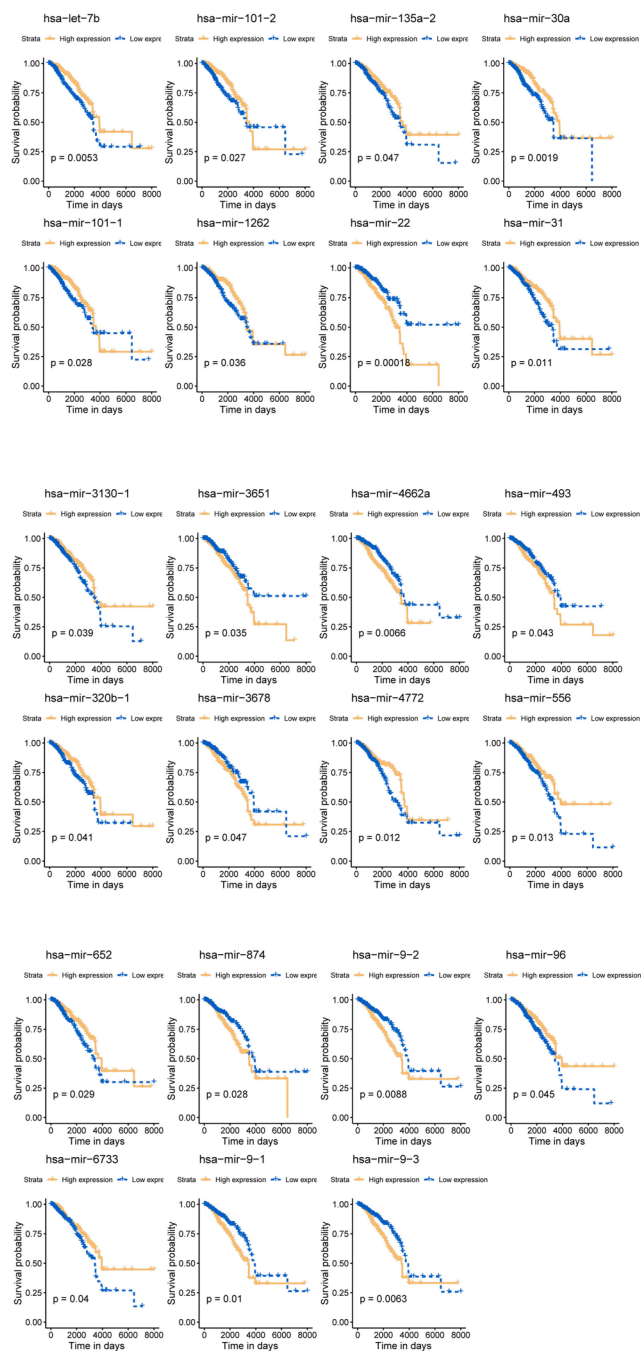

B

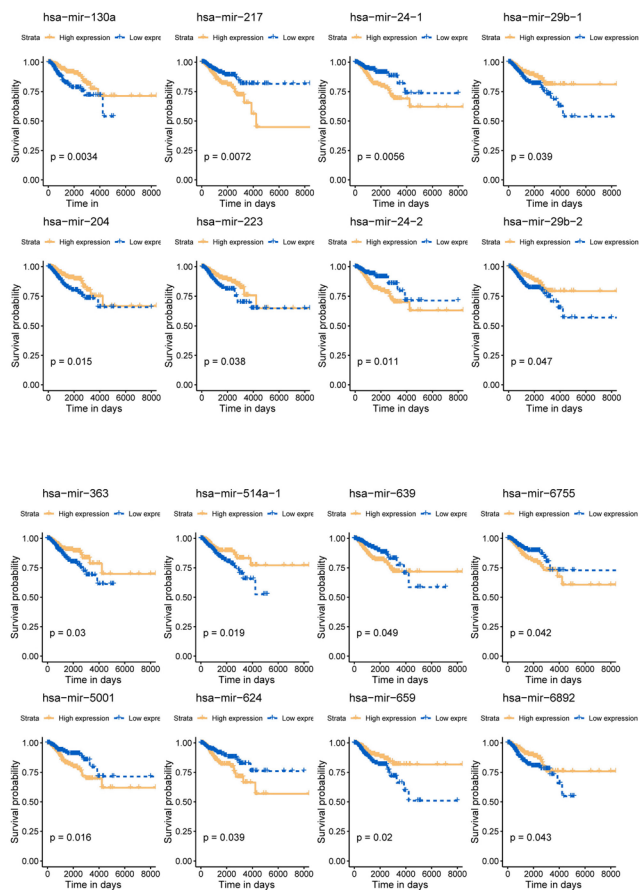

Figure S2. Prediction of miRNAs down-stream target genes. (A) The down-stream gene prediction of OS related miRNAs, let-7b, miR-101-2, miR-135a-2, miR-22, miR-30a, miR-31, miR-3130-1, miR-320b-1, miR-3678, miR-4772, miR-4662a, miR-493, miR-556, miR-652, miR-6733, miR-874, miR-9-3; (B) down-stream gene prediction of RFS related miRNAs, miR-130a, miR-204, miR-217, miR-223, miR-24-2, miR-29b-1, miR-363, miR-5001, miR-514a-1, miR-624, miR-639, miR-659, miR-6892.

A

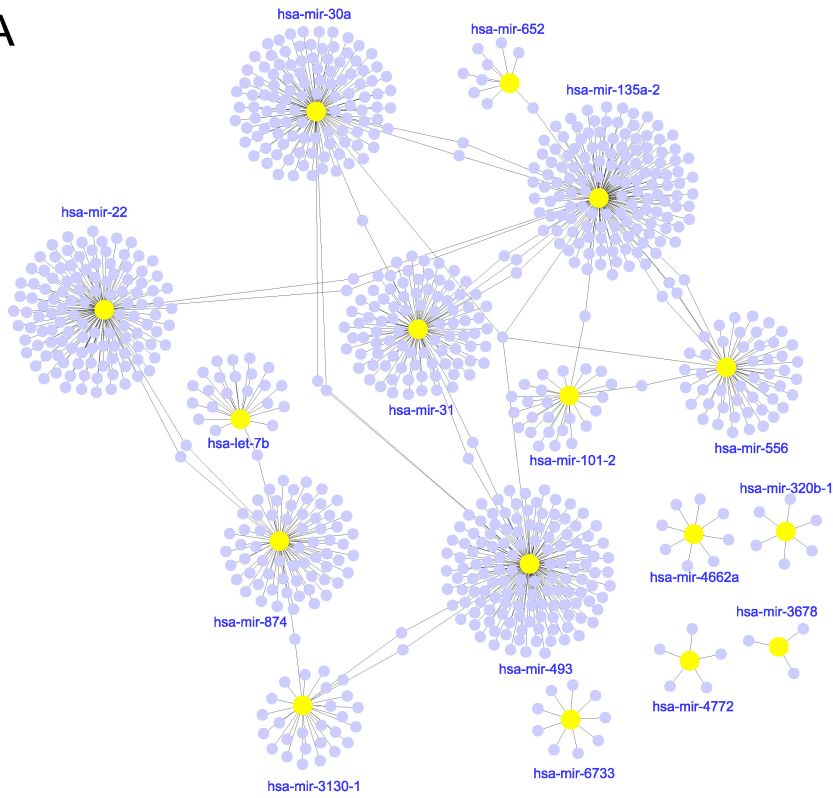

B

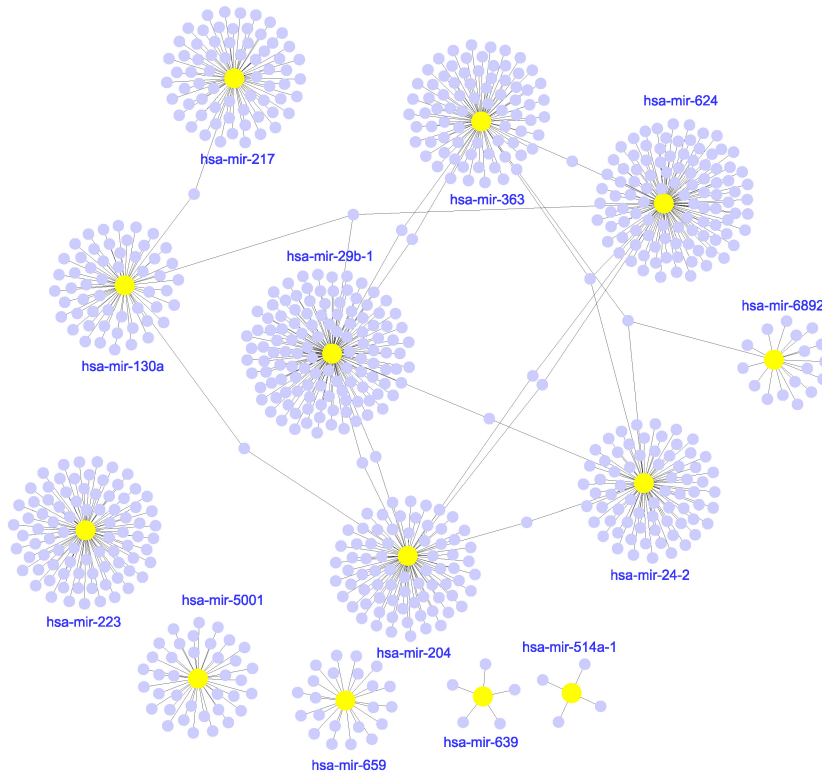

Figure S3. The relative expression of overall survival- and recurrence-free survival-related miRNAs between high-risk and low-risk populations.

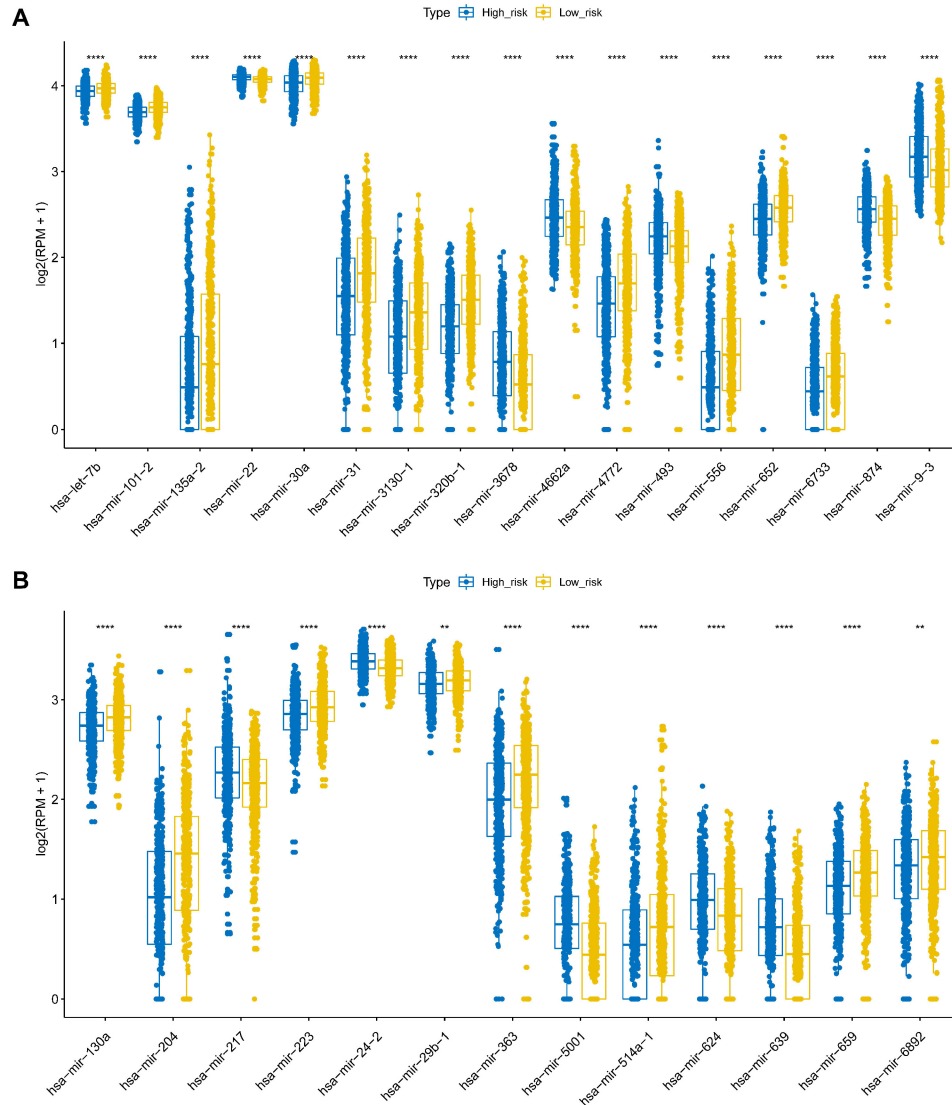

**Table S1.** Co-efficient of each miRNA candidate for the miRNA-based OS predicting signature

| <b>Gene ID</b> | <b>Co-ef</b> | <b>Exp (co-ef)</b> | <b>Se (co-ef)</b> | <b>z</b> | <b>P</b> |
|----------------|--------------|--------------------|-------------------|----------|----------|
| hsa-let-7b     | -0.04109     | 0.959742           | 0.119771          | -0.34308 | 0.731539 |
| hsa-mir-101-2  | 0.008913     | 1.008953           | 0.13396           | 0.066538 | 0.946949 |
| hsa-mir-135a-2 | -0.06609     | 0.936043           | 0.077752          | -0.85006 | 0.39529  |
| hsa-mir-22     | 0.212128     | 1.236306           | 0.210686          | 1.006845 | 0.314009 |
| hsa-mir-30a    | -0.10033     | 0.904536           | 0.082132          | -1.2216  | 0.221858 |
| hsa-mir-31     | -0.14794     | 0.862485           | 0.082249          | -1.79865 | 0.072074 |
| hsa-mir-3130-1 | -0.12391     | 0.883461           | 0.122755          | -1.00939 | 0.312787 |
| hsa-mir-320b-1 | -0.31529     | 0.729578           | 0.134099          | -2.35117 | 0.018714 |
| hsa-mir-3678   | 0.253449     | 1.288461           | 0.146839          | 1.726032 | 0.084342 |
| hsa-mir-4662a  | 0.130754     | 1.139687           | 0.070659          | 1.850484 | 0.064244 |
| hsa-mir-4772   | -0.19431     | 0.823403           | 0.102184          | -1.90157 | 0.057227 |
| hsa-mir-493    | 0.090304     | 1.094507           | 0.114672          | 0.787503 | 0.430987 |
| hsa-mir-556    | -0.18115     | 0.834309           | 0.150123          | -1.20668 | 0.227554 |
| hsa-mir-652    | -0.07597     | 0.926841           | 0.115388          | -0.65842 | 0.510269 |
| hsa-mir-6733   | -0.24615     | 0.781802           | 0.232751          | -1.05759 | 0.290243 |
| hsa-mir-874    | 0.197554     | 1.218418           | 0.124795          | 1.583026 | 0.113416 |
| hsa-mir-9-3    | 0.08307      | 1.086618           | 0.047662          | 1.742916 | 0.081348 |

Co-ef, co-efficient; Exp (co-ef), Experiment (co-ef); Se (co-ef), standard error (co-efficient)

**Table S2.** Co-efficient of each miRNA candidate for the miRNA-based RFS predicting

signature

| <b>Gene ID</b> | <b>Co-ef</b> | <b>Exp (co-ef)</b> | <b>Se (co-ef)</b> | <b>z</b> | <b>P</b> |
|----------------|--------------|--------------------|-------------------|----------|----------|
| hsa-mir-130a   | -0.313       | 0.731507           | 0.140419          | -2.22654 | 0.025978 |
| hsa-mir-204    | -0.113       | 0.892711           | 0.132269          | -0.85804 | 0.39087  |
| hsa-mir-217    | 0.37         | 1.448053           | 0.118008          | 3.137242 | 0.001705 |
| hsa-mir-223    | -0.226       | 0.798087           | 0.126361          | -1.78486 | 0.074284 |
| hsa-mir-24-2   | 0.597        | 1.815876           | 0.179394          | 3.325472 | 0.000883 |
| hsa-mir-29b-1  | -0.047       | 0.954317           | 0.14927           | -0.31326 | 0.754086 |
| hsa-mir-363    | -0.128       | 0.879506           | 0.08995           | -1.42741 | 0.153462 |
| hsa-mir-5001   | 0.447        | 1.564383           | 0.248224          | 1.802771 | 0.071424 |
| hsa-mir-514a-1 | -0.275       | 0.759493           | 0.182051          | -1.51114 | 0.130752 |
| hsa-mir-624    | 0.28         | 1.323083           | 0.227053          | 1.233034 | 0.217563 |
| hsa-mir-639    | 0.474        | 1.60601            | 0.255213          | 1.856303 | 0.06341  |
| hsa-mir-659    | -0.461       | 0.63074            | 0.228269          | -2.01894 | 0.043494 |
| hsa-mir-6892   | -0.268       | 0.764756           | 0.167808          | -1.59824 | 0.109989 |

Co-ef, co-efficient; Exp (co-ef), Experiment (co-ef); Se (co-ef), standard error (co-efficient)

**Table S3.** Multivariate analyses comparison between OS classifier and clinical features

|                            | <b>Co-ef</b> | <b>Exp (co-ef)</b> | <b>Se (co-ef)</b> | <b>z</b> | <b>Pr (&gt;  z )</b> |
|----------------------------|--------------|--------------------|-------------------|----------|----------------------|
| Sex (MALE)                 | -15.0323     | 2.96E-07           | 3824.367          | -0.00393 | 0.996864             |
| Age >= 60                  | 1.213393     | 3.364883           | 0.386713          | 3.137712 | <b>0.001703</b>      |
| Stage III/IV               | 0.534275     | 1.70621            | 0.392192          | 1.36228  | 0.17311              |
| New tumor event            | 1.468692     | 4.343551           | 0.389001          | 3.775552 | <b>0.00016</b>       |
| PAM50 mRNA (HER2-enriched) | 1.701834     | 5.483997           | 0.879751          | 1.93445  | 0.053058             |
| PAM50 mRNA (Luminal A)     | -0.30345     | 0.73827            | 0.796881          | -0.38079 | 0.703358             |
| PAM50 mRNA (Luminal B)     | 0.517542     | 1.677898           | 0.818196          | 0.63254  | 0.527034             |
| PAM50 mRNA (Normal-like)   | 1.264168     | 3.540147           | 1.183139          | 1.068487 | 0.285301             |
| ER Status (Negative)       | -3.47267     | 0.031034           | 1.467848          | -2.36583 | <b>0.01799</b>       |
| ER Status (Positive)       | -3.64004     | 0.026251           | 1.37128           | -2.65448 | <b>0.007943</b>      |
| HER2 Status (Negative)     | 15.66269     | 6341932            | 8160.443          | 0.001919 | 0.998469             |
| HER2 Status (Positive)     | 14.32124     | 1658191            | 8160.443          | 0.001755 | 0.9986               |
| PR Status (Negative)       | 15.28017     | 4326080            | 3988.571          | 0.003831 | 0.996943             |
| PR Status (Positive)       | 15.03724     | 3393048            | 3988.571          | 0.00377  | 0.996992             |
| Classifier (High risk)     | 1.059404     | 2.884652           | 0.416962          | 2.54077  | <b>0.011061</b>      |

Co-ef, co-efficient; Exp (co-ef), Experiment (co-ef); Se (co-ef), standard error (co-efficient); ER, estrogen receptor; PR, progesterone receptor



**Table S4.** Multivariate analyses comparison between RFS classifier and clinical features

|                            | <b>Co-ef</b> | <b>exp(co-ef)</b> | <b>Se (co-ef)</b> | <b>z</b> | <b>Pr (&gt;  z )</b> |
|----------------------------|--------------|-------------------|-------------------|----------|----------------------|
| Sex (MALE)                 | -16.0902     | 1.03E-07          | 5750.799          | -0.0028  | 0.997768             |
| Age >= 60                  | 0.211804     | 1.235905          | 0.366329          | 0.57818  | 0.563143             |
| Stage III/IV               | 1.250033     | 3.490456          | 0.35243           | 3.546898 | <b>0.00039</b>       |
| PAM50 mRNA (HER2-enriched) | 1.823381     | 6.19276           | 0.771997          | 2.3619   | <b>0.018182</b>      |
| PAM50 mRNA (Luminal A)     | 1.19249      | 3.295276          | 0.7128            | 1.672965 | 0.094334             |
| PAM50 mRNA (Luminal B)     | 0.47467      | 1.607483          | 0.788836          | 0.601734 | 0.547351             |
| PAM50 mRNA (Normal-like)   | 0.222358     | 1.249018          | 1.158583          | 0.191922 | 0.847803             |
| ER Status (Negative)       | 16.94968     | 22969473          | 43567.37          | 0.000389 | 0.99969              |
| ER Status (Positive)       | 17.02822     | 24846414          | 43567.37          | 0.000391 | 0.999688             |
| HER2 Status (Negative)     | 18.26335     | 85441933          | 12803.39          | 0.001426 | 0.998862             |
| HER2 Status (Positive)     | 16.69709     | 17842518          | 12803.39          | 0.001304 | 0.998959             |
| PR Status (Negative)       | 17.79637     | 53563075          | 13006.94          | 0.001368 | 0.998908             |
| PR Status (Positive)       | 16.77568     | 19301159          | 13006.94          | 0.00129  | 0.998971             |
| Classifier (High risk)     | 1.4533       | 4.277207          | 0.378178          | 3.842905 | <b>0.000122</b>      |

Co-ef, co-efficient; Exp (co-ef), Experiment (co-ef); Se (co-ef), standard error (co-efficient); ER, estrogen receptor; PR, progesterone receptor
